# Supplementary material for: The Combined Effects of Sr(II) and Poly(Acrylic Acid) on the Morphology of Calcite
Source: MDPI journal article supplement (doi:10.3390/ma12203339), 2019-10-13
Supplement: s1 [file s1]

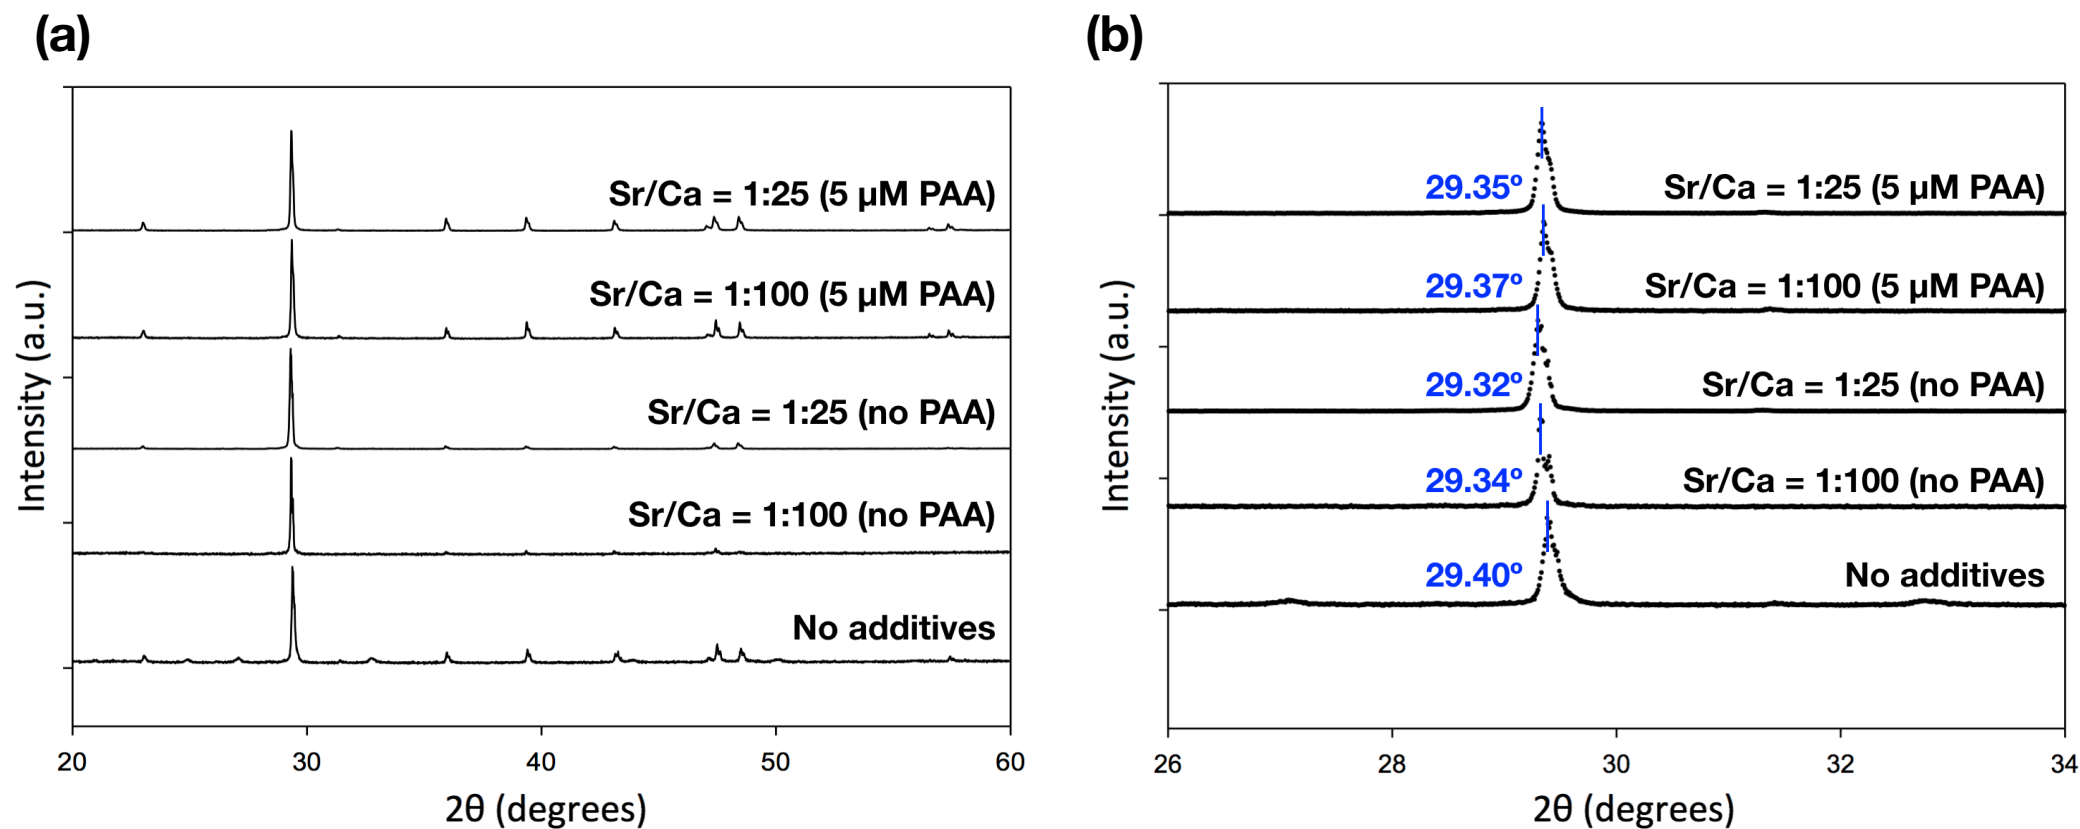

**Figure S1. XRD patterns for the representative calcite crystals: (a) full spectra ( $2\theta$  range 20–60°); (b) zoomed-in spectra where the positions of {104} peaks marked with blue bars.**
